# Supplementary material
Source: MDPI journal article supplement (https://www.mdpi.com/1999-4907/13/2/348)
Supplement: s1 [file s1]

**Table S1. a** The niche breadth and IV ranking of tree species in early successional stage.

| Ranking | Species name                     | Abbreviation | Importance value (%) | Niche breadth $B_L$ |
|---------|----------------------------------|--------------|----------------------|---------------------|
| 1       | <i>Antidesma ghaesembilla</i>    | Agha         | 7.57                 | 4.61                |
| 2       | <i>Melastoma sanguineum</i>      | Msan         | 7.39                 | 2.28                |
| 3       | <i>Garcinia oblongifolia</i>     | Gobl         | 7.36                 | 2.47                |
| 4       | <i>Olea dioica</i>               | Odio         | 7.25                 | 2.40                |
| 5       | <i>Schima superba</i>            | Ssup         | 6.48                 | 2.65                |
| 6       | <i>Syzygium hainanense</i>       | Shai         | 5.78                 | 4.66                |
| 7       | <i>Aporusa dioica</i>            | Adio         | 5.23                 | 1.58                |
| 8       | <i>Diospyros chunii</i>          | Dchu         | 4.43                 | 1.39                |
| 9       | <i>Phyllanthus emblica</i>       | Pemb         | 4.20                 | 3.52                |
| 10      | <i>Wrightia pubescens</i>        | Wpub         | 3.96                 | 1.48                |
| 11      | <i>Memecylon ligustrifolium</i>  | Mlig         | 3.40                 | 4.05                |
| 12      | <i>Glochidion wrightii</i>       | Gwri         | 3.21                 | 2.61                |
| 13      | <i>Rhodomyrtus tomentosa</i>     | Rtom         | 3.14                 | 1.21                |
| 14      | <i>Machilus pomifera</i>         | Mpom         | 3.11                 | 1.00                |
| 15      | <i>Aporusa villosa</i>           | Avil         | 2.60                 | 2.52                |
| 16      | <i>Cratoxylum cochinchinense</i> | Ccoc         | 2.05                 | 1.81                |
| 17      | <i>Millettia dielsiana</i>       | Mdie         | 1.98                 | 1.00                |
| 18      | <i>Albizia attopuensis</i>       | Aatt         | 1.44                 | 1.79                |
| 19      | <i>Syzygium tephrodes</i>        | Step         | 1.38                 | 1.33                |
| 20      | <i>Psychotria rubra</i>          | Prub         | 1.31                 | 1.00                |
| 21      | <i>Saccopetalum prolificum</i>   | Spro         | 1.13                 | 1.37                |
| 22      | <i>Microcos chungii</i>          | Mchu         | 1.06                 | 1.00                |
| 23      | <i>Zanthoxylum avicennae</i>     | Zavi         | 1.01                 | 1.92                |
| 24      | <i>Ormosia semicastrata</i>      | Osem         | 1.00                 | 1.59                |
| 25      | <i>Koiloceras bairdianum</i>     | Kbai         | 0.93                 | 1.00                |
| 26      | <i>Vitex pierreana</i>           | Vpie         | 0.87                 | 1.00                |
| 27      | <i>Peltophorum pterocarpum</i>   | Ppte         | 0.83                 | 1.00                |
| 28      | <i>Xanthophyllum hainanense</i>  | Xhai         | 0.77                 | 1.00                |
| 29      | <i>Vatica mangachapoi</i>        | Vman         | 0.75                 | 1.00                |
| 30      | <i>Salix myrtilloides</i>        | Smyr         | 0.73                 | 1.00                |
| 31      | <i>Radermachera frondosa</i>     | Rfro         | 0.73                 | 1.00                |
| 32      | <i>Cinnamomum porrectum</i>      | Cpor         | 0.70                 | 1.00                |
| 33      | <i>Machilus chinensis</i>        | Mchi         | 0.70                 | 1.00                |
| 34      | <i>Camellia japonica</i>         | Cjap         | 0.69                 | 1.00                |
| 35      | <i>Rhodamnia dumetorum</i>       | Rdum         | 0.66                 | 1.00                |
| 36      | <i>Crateva formosensis</i>       | Cfor         | 0.64                 | 1.00                |
| 37      | <i>Heritiera angustata</i>       | Hang         | 0.53                 | 1.00                |
| 38      | <i>Dillenia turbinata</i>        | Dtur         | 0.52                 | 1.00                |
| 39      | <i>Flacourtia rukam</i>          | Fruk         | 0.52                 | 1.00                |
| 40      | <i>Decaspermum gracilentum</i>   | Dgra         | 0.50                 | 1.00                |
| 41      | <i>Antidesma montanum</i>        | Amon         | 0.49                 | 1.00                |
| 42      | <i>Wikstroemia nutans</i>        | Wnut         | 0.48                 | 1.00                |
| 43      | <i>Canthium horridum</i>         | Chor         | 0.47                 | 1.00                |

**Table S1. b** The niche breadth and IV ranking of tree species in early-mid successional stage.

| Ranking | Species name                    | Abbreviation | Importance value (%) | Niche breadth $B_L$ |
|---------|---------------------------------|--------------|----------------------|---------------------|
| 1       | <i>Hopea exalata</i>            | Hexa         | 14.29                | 5.57                |
| 2       | <i>Vatica mangachapoi</i>       | Vman         | 7.59                 | 5.77                |
| 3       | <i>Garcinia oblongifolia</i>    | Gobl         | 4.91                 | 4.57                |
| 4       | <i>Koilodepas bairanense</i>    | Kbai         | 3.58                 | 2.82                |
| 5       | <i>Schima superba</i>           | Ssup         | 3.56                 | 3.34                |
| 6       | <i>Alphonsea monogyna</i>       | Almon        | 3.01                 | 3.79                |
| 7       | <i>Castanopsis jucunda</i>      | Cjuc         | 3.00                 | 1.00                |
| 8       | <i>Memecylon ligustrifolium</i> | Mlig         | 2.80                 | 4.33                |
| 9       | <i>Engelhardia fenzelii</i>     | Efen         | 2.58                 | 2.57                |
| 10      | <i>Mallotus hookerianus</i>     | Mhoo         | 2.49                 | 3.03                |
| 11      | <i>Diospyros howii</i>          | Dhow         | 2.43                 | 3.56                |
| 12      | <i>Machilus chinensis</i>       | Mchi         | 2.38                 | 3.61                |
| 13      | <i>Diospyros chunii</i>         | Dchu         | 2.37                 | 2.32                |
| 14      | <i>Sterculia lanceolata</i>     | Slan         | 2.24                 | 1.00                |
| 15      | <i>Reevesia bottingensis</i>    | Rbot         | 2.10                 | 1.36                |
| 16      | <i>Acronychia oligophlebia</i>  | Aoli         | 2.02                 | 3.12                |
| 17      | <i>Croton laevigatus</i>        | Clae         | 1.83                 | 1.67                |
| 18      | <i>Dillenia turbinata</i>       | Dtur         | 1.82                 | 4.86                |
| 19      | <i>Antirhea chinensis</i>       | Anchi        | 1.65                 | 2.56                |
| 20      | <i>Rhodamnia dumetorum</i>      | Rdum         | 1.61                 | 1.24                |
| 21      | <i>Olea dioica</i>              | Odio         | 1.55                 | 2.91                |
| 22      | <i>Syzygium tephrodes</i>       | Step         | 1.46                 | 3.17                |
| 23      | <i>Ardisia densilepidotula</i>  | Aden         | 1.42                 | 3.91                |
| 24      | <i>Castanopsis hainanensis</i>  | Chai         | 1.32                 | 1.00                |
| 25      | <i>Amesiodendron chinense</i>   | Amchi        | 1.26                 | 1.64                |
| 26      | <i>Antidesma montanum</i>       | Anmon        | 1.21                 | 1.05                |
| 27      | <i>Ficus variolosa</i>          | Fvar         | 1.07                 | 3.10                |
| 28      | <i>Styrax hainanensis</i>       | Shai         | 1.07                 | 1.62                |
| 29      | <i>Heritiera angustata</i>      | Hang         | 1.03                 | 1.00                |
| 30      | <i>Syzygium chunianum</i>       | Schu         | 0.88                 | 1.37                |
| 31      | <i>Ficus concinna</i>           | Fcon         | 0.81                 | 1.00                |
| 32      | <i>Albizia attopuensis</i>      | Aatt         | 0.77                 | 1.74                |
| 33      | <i>Radermachera frondosa</i>    | Rfro         | 0.74                 | 1.92                |
| 34      | <i>Psychotria rubra</i>         | Prub         | 0.71                 | 1.95                |
| 35      | <i>Symplocos poilanei</i>       | Spoi         | 0.69                 | 1.73                |
| 36      | <i>Xanthophyllum hainanense</i> | Xhai         | 0.68                 | 2.80                |
| 37      | <i>Goniothalamus chinensis</i>  | Gchi         | 0.65                 | 1.00                |
| 38      | <i>Bridelia insulana</i>        | Bins         | 0.63                 | 1.00                |
| 39      | <i>Litchi chinensis</i>         | Lchi         | 0.59                 | 1.34                |
| 40      | <i>Gonocaryum lobbianum</i>     | Glob         | 0.54                 | 1.54                |
| 41      | <i>Crateva formosensis</i>      | Crfor        | 0.54                 | 2.00                |
| 42      | <i>Aporosa villosa</i>          | Avil         | 0.54                 | 1.56                |
| 43      | <i>Albertisia laurifolia</i>    | Alau         | 0.51                 | 1.00                |
| 44      | <i>Amoora tsangii</i>           | Atsa         | 0.51                 | 1.00                |
| 45      | <i>Cryptocarya metcalfiana</i>  | Cmet         | 0.50                 | 1.49                |
| 46      | <i>Camellia furfuracea</i>      | Cfur         | 0.49                 | 1.69                |

|    |                                     |       |      |      |
|----|-------------------------------------|-------|------|------|
| 47 | <i>Microcos chungii</i>             | Mchu  | 0.47 | 1.73 |
| 48 | <i>Heritiera parvifolia</i>         | Hpar  | 0.46 | 1.98 |
| 49 | <i>Cinnamomum porrectum</i>         | Cpor  | 0.46 | 2.00 |
| 50 | <i>Scleropyrum wallichianum</i>     | Swal  | 0.45 | 1.96 |
| 51 | <i>Glochidion coccineum</i>         | Gcoc  | 0.43 | 1.98 |
| 52 | <i>Prismatomeris tetrantra</i>      | Ptet  | 0.43 | 1.00 |
| 53 | <i>Tarennoidea wallichii</i>        | Twal  | 0.41 | 1.00 |
| 54 | <i>Magnolia championii</i>          | Mcha  | 0.40 | 1.00 |
| 55 | <i>Antidesma hainanense</i>         | Ahai  | 0.40 | 1.00 |
| 56 | <i>Themeda caudata</i>              | Tcau  | 0.37 | 1.00 |
| 57 | <i>Peltophorum pterocarpum</i>      | Ppte  | 0.36 | 1.00 |
| 58 | <i>Sarcosperma laurinum</i>         | Slau  | 0.36 | 1.00 |
| 59 | <i>Ellipanthus glabrifolius</i>     | Egla  | 0.32 | 1.00 |
| 60 | <i>Cyclobalanopsis blakei</i>       | Cbla  | 0.32 | 1.00 |
| 61 | <i>Antidesma ghaesembilla</i>       | Agha  | 0.31 | 1.00 |
| 62 | <i>Castanopsis formosana</i>        | Cafor | 0.30 | 1.00 |
| 63 | <i>Lithocarpus skanianus</i>        | Lska  | 0.28 | 1.00 |
| 64 | <i>Fagerlindia depauperata</i>      | Fdep  | 0.27 | 1.00 |
| 65 | <i>Scolopia saeva</i>               | Ssae  | 0.27 | 1.00 |
| 66 | <i>Glochidion wrightii</i>          | Gwri  | 0.26 | 1.00 |
| 67 | <i>Beilschmiedia yunnanensis</i>    | Byun  | 0.24 | 1.00 |
| 68 | <i>Beilschmiedia longipetiolata</i> | Blon  | 0.24 | 1.00 |
| 69 | <i>Machilus pomifera</i>            | Mpom  | 0.24 | 1.00 |
| 70 | <i>Phoebe tavoyana</i>              | Ptav  | 0.22 | 1.00 |
| 71 | <i>Laurocerasus phaeosticta</i>     | Lpha  | 0.22 | 1.00 |
| 72 | <i>Staphylea bumalda</i>            | Sbum  | 0.21 | 1.00 |
| 73 | <i>Syzygium brachythyrsum</i>       | Sbra  | 0.21 | 1.00 |
| 74 | <i>Vitex pierreana</i>              | Vpie  | 0.21 | 1.00 |
| 75 | <i>Diospyros strigosa</i>           | Dstr  | 0.21 | 1.00 |
| 76 | <i>Homalium phanerophlebium</i>     | Hpha  | 0.21 | 1.00 |

---

**Table S1. c** The niche breadth and IV ranking of tree species in mid successional stage.

| Ranking | Species name                     | Abbreviation | Importance<br>value<br>(%) | Niche breadth $B_L$ |
|---------|----------------------------------|--------------|----------------------------|---------------------|
| 1       | <i>Hopea exalata</i>             | Hexa         | 17.82                      | 4.54                |
| 2       | <i>Vatica mangachapoi</i>        | Vman         | 7.52                       | 4.65                |
| 3       | <i>Schima superba</i>            | Ssup         | 4.50                       | 3.72                |
| 4       | <i>Garcinia oblongifolia</i>     | Gobl         | 3.56                       | 5.62                |
| 5       | <i>Olea dioica</i>               | Odio         | 3.46                       | 3.06                |
| 6       | <i>Antirhea chinensis</i>        | Anchi        | 3.37                       | 1.03                |
| 7       | <i>Heritiera parvifolia</i>      | Hpar         | 3.31                       | 1.61                |
| 8       | <i>Cyclobalanopsis blakei</i>    | Cbla         | 3.03                       | 1.00                |
| 9       | <i>Alphonsea monogyna</i>        | Almon        | 2.93                       | 3.66                |
| 10      | <i>Syzygium chunianum</i>        | Schu         | 2.38                       | 2.80                |
| 11      | <i>Dillenia turbinata</i>        | Dtur         | 2.28                       | 2.16                |
| 12      | <i>Mallotus hookerianus</i>      | Mhoo         | 2.02                       | 2.31                |
| 13      | <i>Koilocedrus bairdiana</i>     | Kbai         | 1.93                       | 2.40                |
| 14      | <i>Diospyros howii</i>           | Dhow         | 1.92                       | 2.69                |
| 15      | <i>Ficus microcarpa</i>          | Fmic         | 1.86                       | 1.00                |
| 16      | <i>Ardisia densilepidotula</i>   | Aden         | 1.65                       | 2.45                |
| 17      | <i>Amesiodendron chinense</i>    | Amchi        | 1.54                       | 1.32                |
| 18      | <i>Machilus chinensis</i>        | Mchi         | 1.45                       | 1.77                |
| 19      | <i>Cinnamomum porrectum</i>      | Cpor         | 1.44                       | 2.86                |
| 20      | <i>Ficus variolosa</i>           | Fvar         | 1.43                       | 2.68                |
| 21      | <i>Suregada glomerulata</i>      | Sglo         | 1.40                       | 2.58                |
| 22      | <i>Litchi chinensis</i>          | Lchi         | 1.39                       | 2.05                |
| 23      | <i>Memecylon ligustrifolium</i>  | Mlig         | 1.30                       | 2.18                |
| 24      | <i>Phoebe tavoyana</i>           | Ptav         | 1.15                       | 1.79                |
| 25      | <i>Aporosa dioica</i>            | Adio         | 1.10                       | 2.23                |
| 26      | <i>Amoora tsangii</i>            | Atsa         | 1.07                       | 1.44                |
| 27      | <i>Engelhardia fenzelii</i>      | Efen         | 1.04                       | 1.68                |
| 28      | <i>Albizia attopuensis</i>       | Aatt         | 0.96                       | 1.00                |
| 29      | <i>Heritiera angustata</i>       | Hang         | 0.85                       | 2.81                |
| 30      | <i>Xanthophyllum hainanense</i>  | Xhai         | 0.82                       | 2.68                |
| 31      | <i>Psychotria rubra</i>          | Prub         | 0.80                       | 1.42                |
| 32      | <i>Symplocos pseudobarberina</i> | Spse         | 0.76                       | 1.37                |
| 33      | <i>Machilus pomifera</i>         | Mpom         | 0.72                       | 1.92                |
| 34      | <i>Rhodamnia dumetorum</i>       | Rdum         | 0.71                       | 1.31                |
| 35      | <i>Crateva formosensis</i>       | Crfor        | 0.71                       | 1.53                |
| 36      | <i>Antidesma montanum</i>        | Anmon        | 0.66                       | 1.15                |
| 37      | <i>Diospyros chunii</i>          | Dchu         | 0.66                       | 2.00                |
| 38      | <i>Acronychia oligophlebia</i>   | Aoli         | 0.66                       | 1.00                |
| 39      | <i>Laurocerasus phaeosticta</i>  | Lpha         | 0.65                       | 1.21                |
| 40      | <i>Ellipanthus glabrifolius</i>  | Egla         | 0.63                       | 1.63                |
| 41      | <i>Saccopetalum prolificum</i>   | Spro         | 0.57                       | 2.00                |
| 42      | <i>Flacourtia rukam</i>          | Fruk         | 0.53                       | 1.89                |
| 43      | <i>Reevesia thyrsoidea</i>       | Rthy         | 0.53                       | 1.00                |
| 44      | <i>Melodinus suaveolens</i>      | Msua         | 0.50                       | 1.00                |
| 45      | <i>Canarium album</i>            | Calb         | 0.50                       | 1.93                |

|    |                                     |       |      |      |
|----|-------------------------------------|-------|------|------|
| 46 | <i>Pouteria annamensis</i>          | Pann  | 0.45 | 1.00 |
| 47 | <i>Olea hainanensis</i>             | Ohai  | 0.41 | 1.00 |
| 48 | <i>Castanopsis formosana</i>        | Cafor | 0.41 | 1.00 |
| 49 | <i>Radermachera frondosa</i>        | Rfro  | 0.40 | 1.00 |
| 50 | <i>Symplocos poilanei</i>           | Spoi  | 0.37 | 1.00 |
| 51 | <i>Syzygium tephrodes</i>           | Step  | 0.35 | 1.00 |
| 52 | <i>Themeda caudata</i>              | Tcau  | 0.35 | 1.00 |
| 53 | <i>Lindera communis</i>             | Lcom  | 0.35 | 1.00 |
| 54 | <i>Cryptocarya metcalfiana</i>      | Cmet  | 0.34 | 1.00 |
| 55 | <i>Castanopsis hainanensis</i>      | Chai  | 0.32 | 1.00 |
| 56 | <i>Tarennoidea wallichii</i>        | Twal  | 0.32 | 1.00 |
| 57 | <i>Goniothalamus gardneri</i>       | Ggar  | 0.29 | 1.00 |
| 58 | <i>Ardisia nervosa</i>              | Aner  | 0.29 | 1.00 |
| 59 | <i>Beilschmiedia longipetiolata</i> | Blon  | 0.28 | 1.00 |
| 60 | <i>Prismatomeris tetrantra</i>      | Ptet  | 0.28 | 1.00 |
| 61 | <i>Streblus ilicifolius</i>         | Sili  | 0.28 | 1.00 |
| 62 | <i>Lithocarpus skanianus</i>        | Lska  | 0.27 | 1.00 |
| 63 | <i>Decaspermum hainanense</i>       | Dhai  | 0.26 | 1.00 |
| 64 | <i>Callicarpa brevipes</i>          | Cbre  | 0.25 | 1.00 |
| 65 | <i>Aquilaria sinensis</i>           | Asin  | 0.25 | 1.00 |
| 66 | <i>Litsea elongata</i>              | Lelo  | 0.25 | 1.00 |
| 67 | <i>Camellia furfuracea</i>          | Cfur  | 0.25 | 1.00 |
| 68 | <i>Styrax hainanensis</i>           | Shai  | 0.25 | 1.00 |
| 69 | <i>Popowia pisocarpa</i>            | Ppis  | 0.25 | 1.00 |
| 70 | <i>Ilex triflora</i>                | Itri  | 0.25 | 1.00 |
| 71 | <i>Gonocaryum lobbianum</i>         | Glob  | 0.24 | 1.00 |
| 72 | <i>Croton laevigatus</i>            | Clae  | 0.24 | 1.00 |
| 73 | <i>Salacia macrophylla</i>          | Smac  | 0.24 | 1.00 |
| 74 | <i>Sarcosperma laurinum</i>         | Slau  | 0.24 | 1.00 |
| 75 | <i>Diplospora dubia</i>             | Ddub  | 0.24 | 1.00 |
| 76 | <i>Ardisia quinqueгона</i>          | Aqui  | 0.24 | 1.00 |
| 77 | <i>Diospyros strigosa</i>           | Dstr  | 0.24 | 1.00 |
| 78 | <i>Camellia oleifera</i>            | Cole  | 0.24 | 1.00 |
| 79 | <i>Sindora glabra</i>               | Sgla  | 0.24 | 1.00 |

---
